# Supplementary material for: ESICM guidelines on acute respiratory distress syndrome: definition, phenotyping and respiratory support strategies
Source: PubMed Central journal article supplement — Intensive Care Med. 2023 Jun 16;49(7):727–59. doi: 10.1007/s00134-023-07050-7 (PMC10354163; doi:10.1007/s00134-023-07050-7), 2023-06-16
Supplement: 134_2023_7050_MOESM2_ESM.pdf [file 134_2023_7050_MOESM2_ESM.pdf]

# ESICM ARDS Consensus and Guidelines - Panel feedback

Friday, October 21, 2022

**45**

Total Responses

Date Created: Tuesday, September 27, 2022

Complete Responses: 45

to reduce intubation (strong recommendation; moderate level of evidence). We are unable to make a recommendation for or against the use of HFNC over conventional oxygen therapy to reduce mortality (no recommendation; high level of evidence). This recommendation applies also to ARDS from COVID-19 (low level of evidence for intubation and moderate level for mortality, given indirectness).

Answered: 45 Skipped: 0

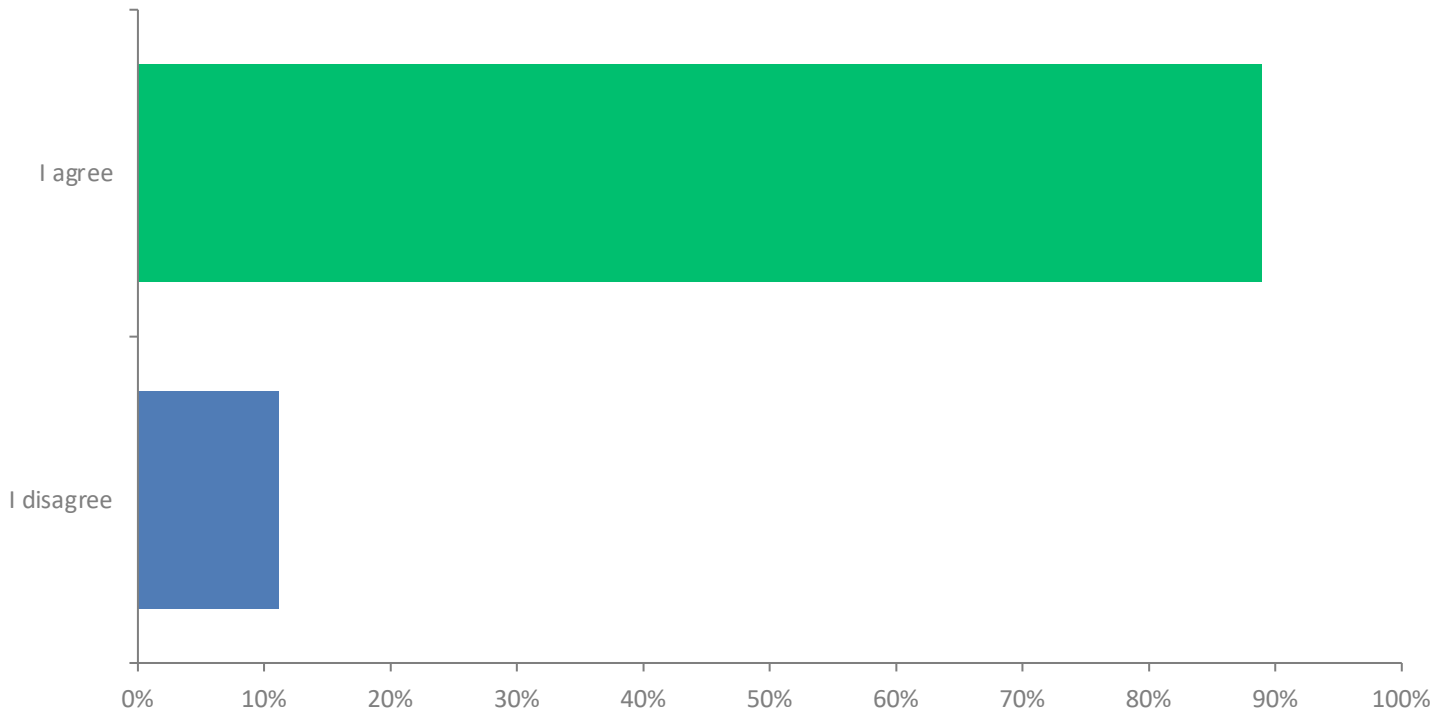

# evidence for intubation and moderate level for mortality, given indirectness).

Answered: 45 Skipped: 0

| ANSWER CHOICES | RESPONSES |    |
|----------------|-----------|----|
| I agree        | 88.89%    | 40 |
| I disagree     | 11.11%    | 5  |
| TOTAL          |           | 45 |

# CPAP/NIV can decrease mortality compared to HFNC in COVID-19 (no recommendation; high level of evidence).

Answered: 45 Skipped: 0

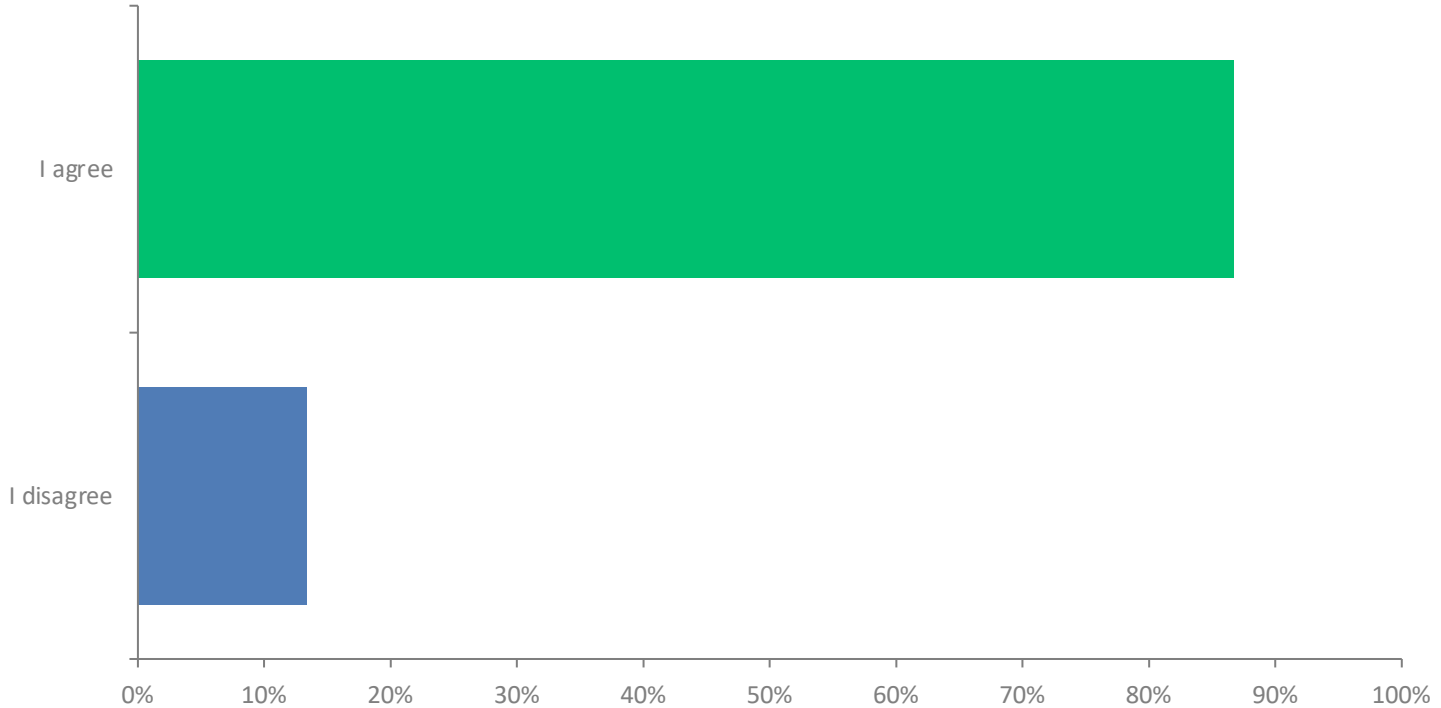

# CPAP/NIV can decrease mortality compared to HFNC in COVID-19 (no recommendation; high level of evidence).

Answered: 45 Skipped: 0

| ANSWER CHOICES | RESPONSES |    |
|----------------|-----------|----|
| I agree        | 86.67%    | 39 |
| I disagree     | 13.33%    | 6  |
| TOTAL          |           | 45 |

# for or against the use of NIV/CPAP over conventional oxygen therapy to reduce mortality (no recommendation; moderate level of evidence).

Answered: 45 Skipped: 0

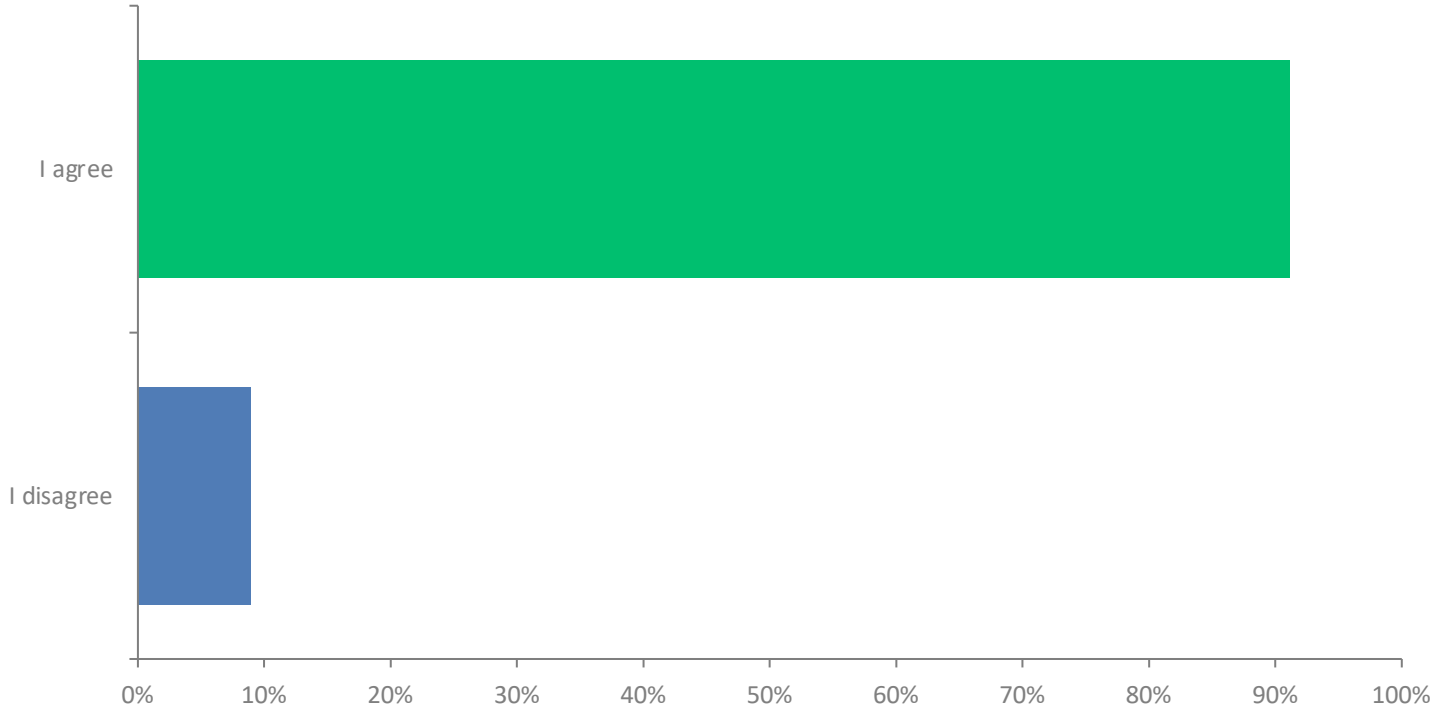

# for or against the use of NIV/CPAP over conventional oxygen therapy to reduce mortality (no recommendation; moderate level of evidence).

Answered: 45 Skipped: 0

| ANSWER CHOICES | RESPONSES |    |
|----------------|-----------|----|
| I agree        | 91.11%    | 41 |
| I disagree     | 8.89%     | 4  |
| TOTAL          |           | 45 |



# as compared to face mask to prevent intubation or reduce mortality in patients with ARDS (no recommendation; low level of evidence).

Answered: 45 Skipped: 0

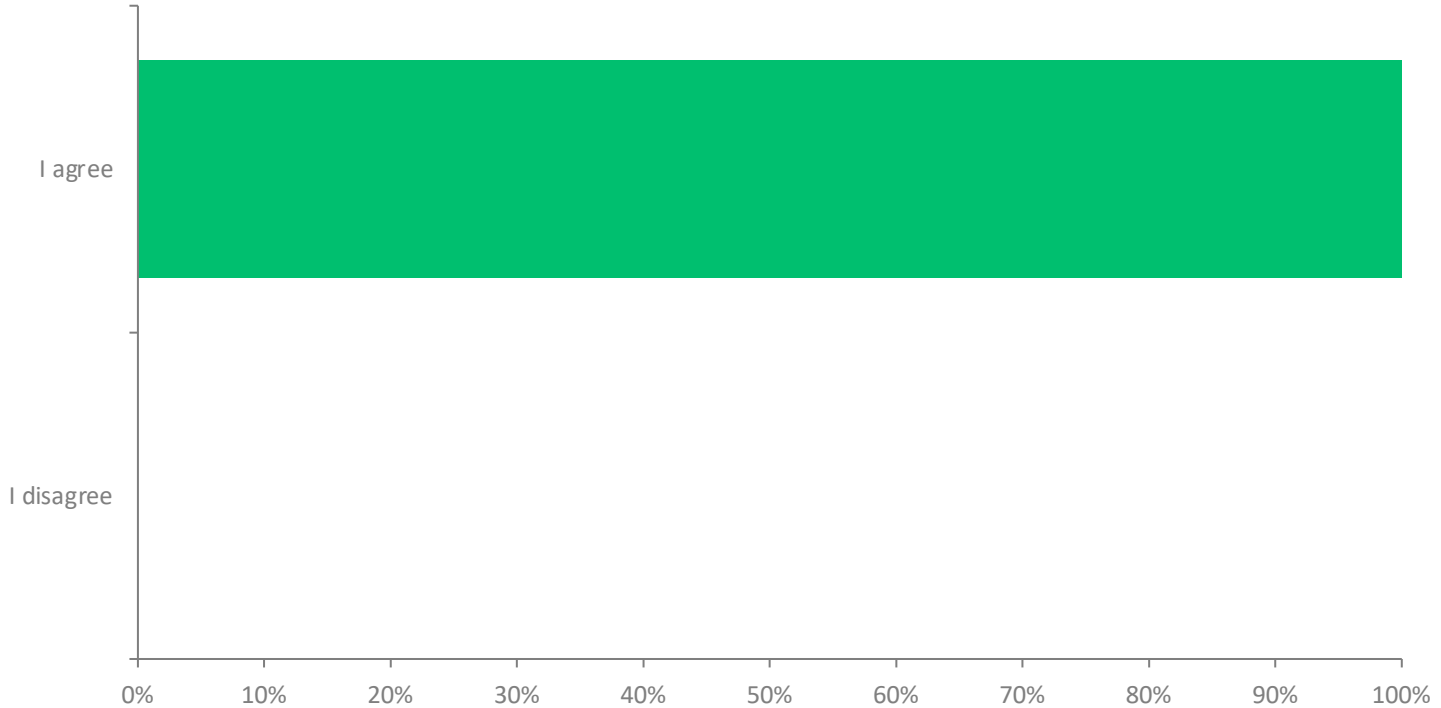

# as compared to face mask to prevent intubation or reduce mortality in patients with ARDS (no recommendation; low level of evidence).

Answered: 45 Skipped: 0

| ANSWER CHOICES | RESPONSES |    |
|----------------|-----------|----|
| I agree        | 100%      | 45 |
| I disagree     | 0%        | 0  |
| TOTAL          |           | 45 |

# make a recommendation for or against the use of NIV compared to CPAP for the treatment of ARDS (no recommendation; no data available).

Answered: 44 Skipped: 1



# make a recommendation for or against the use of NIV compared to CPAP for the treatment of ARDS (no recommendation; no data available).

Answered: 44 Skipped: 1

| ANSWER CHOICES | RESPONSES |    |
|----------------|-----------|----|
| I agree        | 100%      | 44 |
| I disagree     | 0%        | 0  |
| TOTAL          |           | 44 |

# recommendation applies also to ARDS from COVID-19 (weak recommendation; moderate level of evidence given indirectness).

Answered: 45 Skipped: 0

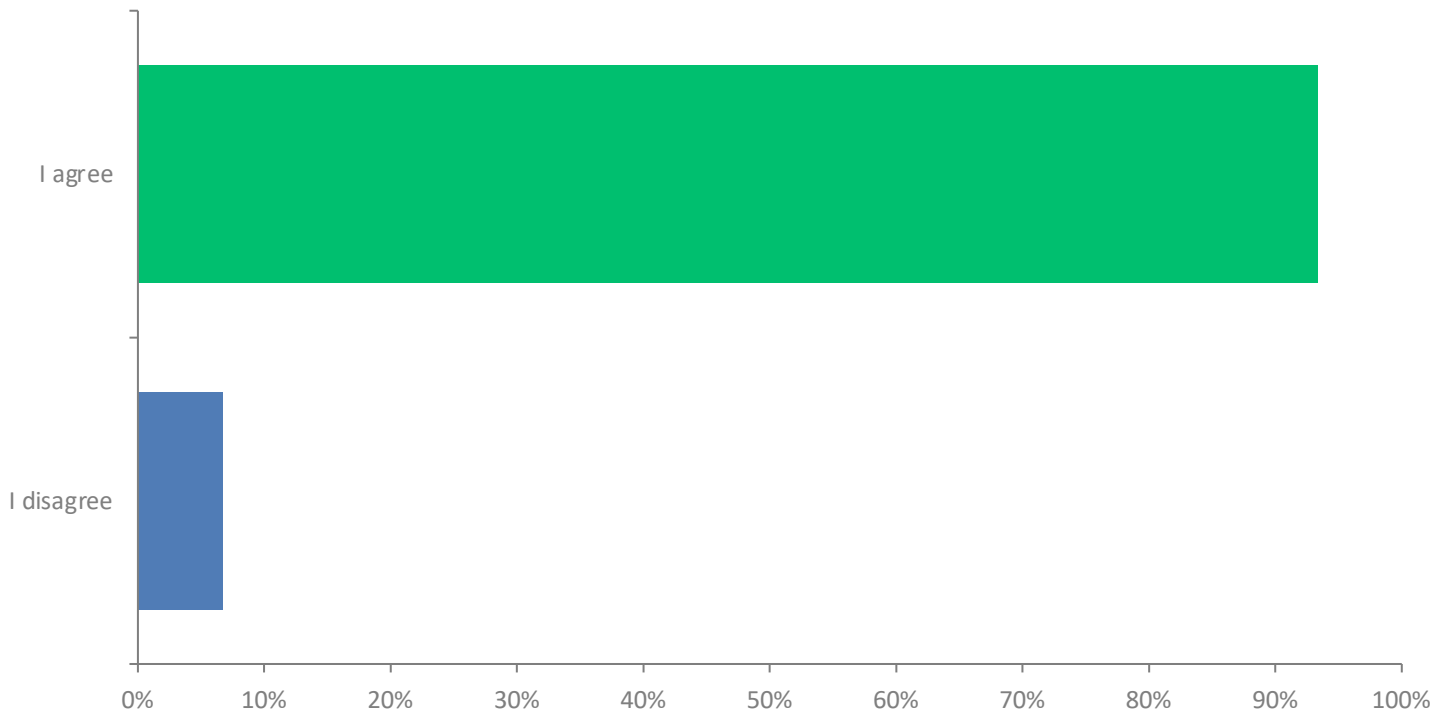

**recommendation applies also to ARDS from COVID-19 (weak recommendation; moderate level of evidence given indirectness).**

Answered: 45 Skipped: 0

| ANSWER CHOICES | RESPONSES |    |
|----------------|-----------|----|
| I agree        | 93.33%    | 42 |
| I disagree     | 6.67%     | 3  |
| TOTAL          |           | 45 |

# statement applies also to ARDS from COVID-19 (moderate level of evidence given indirectness).

Answered: 45 Skipped: 0

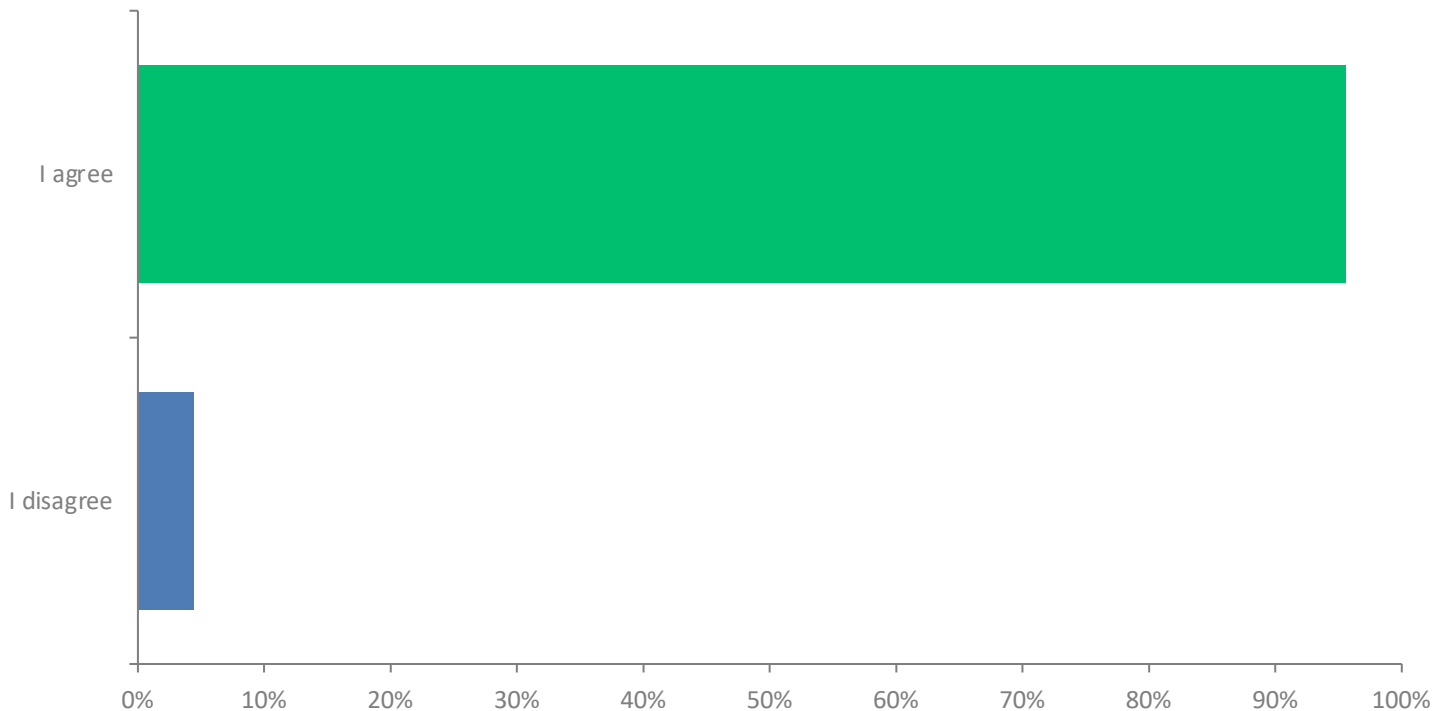

# statement applies also to ARDS from COVID-19 (moderate level of evidence given indirectness).

Answered: 45 Skipped: 0

| ANSWER CHOICES | RESPONSES |    |
|----------------|-----------|----|
| I agree        | 95.56%    | 43 |
| I disagree     | 4.44%     | 2  |
| TOTAL          |           | 45 |



# ARDS from COVID-19 (no recommendation; moderate level of evidence given indirectness).

Answered: 45 Skipped: 0

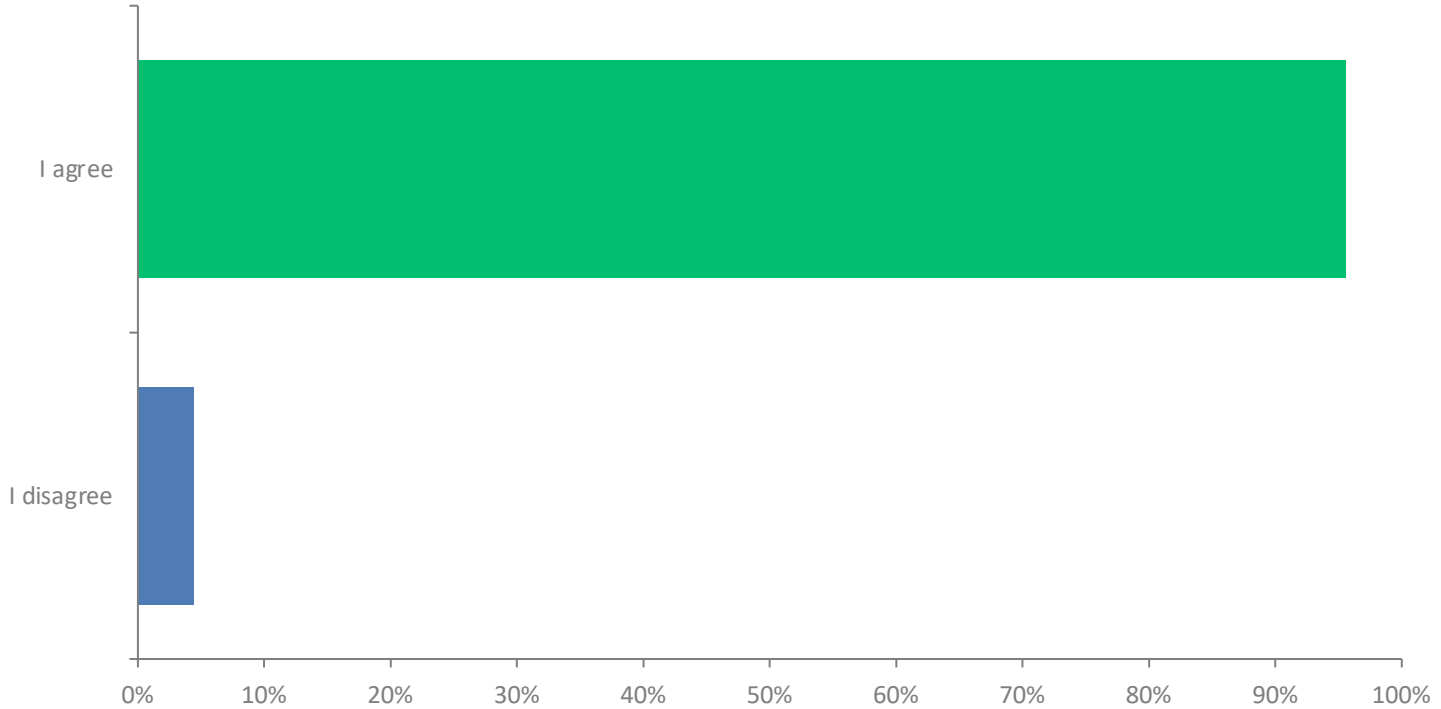

# ARDS from COVID-19 (no recommendation; moderate level of evidence given indirectness).

Answered: 45 Skipped: 0

| ANSWER CHOICES | RESPONSES |    |
|----------------|-----------|----|
| I agree        | 95.56%    | 43 |
| I disagree     | 4.44%     | 2  |
| TOTAL          |           | 45 |

# applies also to ARDS from COVID-19 (low level of evidence given indirectness).

Answered: 45 Skipped: 0

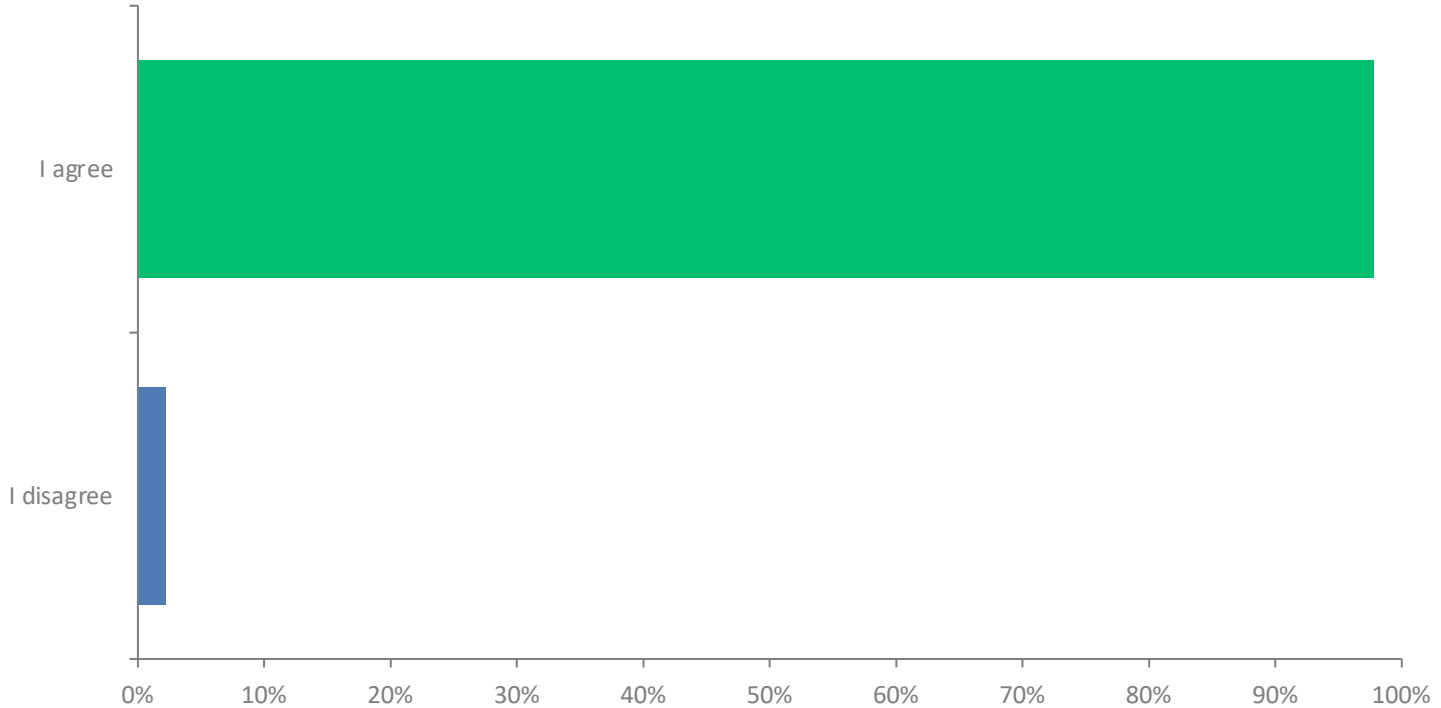

# applies also to ARDS from COVID-19 (low level of evidence given indirectness).

Answered: 45 Skipped: 0

| ANSWER CHOICES | RESPONSES |    |
|----------------|-----------|----|
| I agree        | 97.78%    | 44 |
| I disagree     | 2.22%     | 1  |
| TOTAL          |           | 45 |

# also to ARDS from COVID-19 (moderate level of evidence given indirectness).

Answered: 45 Skipped: 0



## also to ARDS from COVID-19 (moderate level of evidence given indirectness).

Answered: 45 Skipped: 0

| ANSWER CHOICES | RESPONSES |    |
|----------------|-----------|----|
| I agree        | 97.78%    | 44 |
| I disagree     | 2.22%     | 1  |
| TOTAL          |           | 45 |

# recommendation applies also to ARDS from COVID-19 (moderate level of evidence given indirectness).

Answered: 45 Skipped: 0

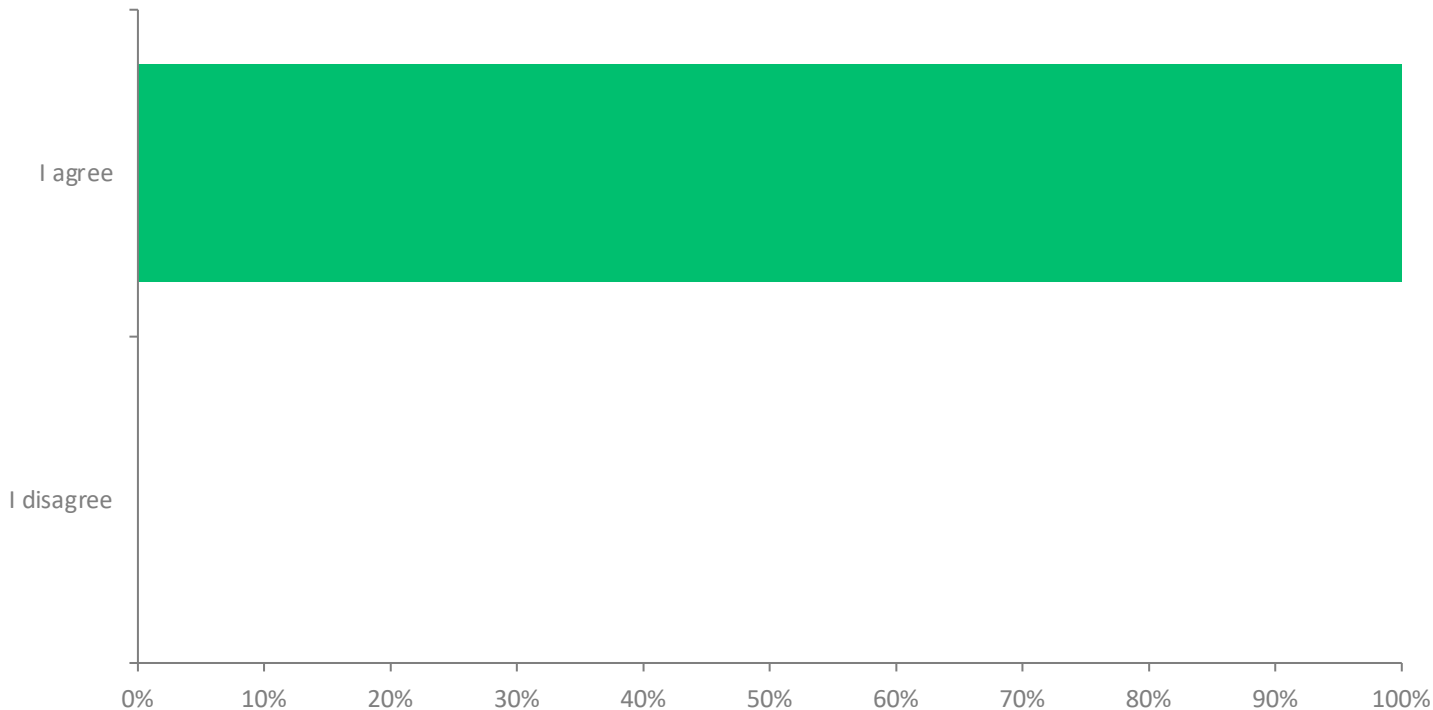

**recommendation applies also to ARDS from COVID-19 (moderate level of evidence given indirectness).**

Answered: 45 Skipped: 0

| ANSWER CHOICES | RESPONSES |    |
|----------------|-----------|----|
| I agree        | 100%      | 45 |
| I disagree     | 0%        | 0  |
| TOTAL          |           | 45 |



# applies also to ARDS from COVID-19 (moderate level of evidence given indirectness).

Answered: 45 Skipped: 0

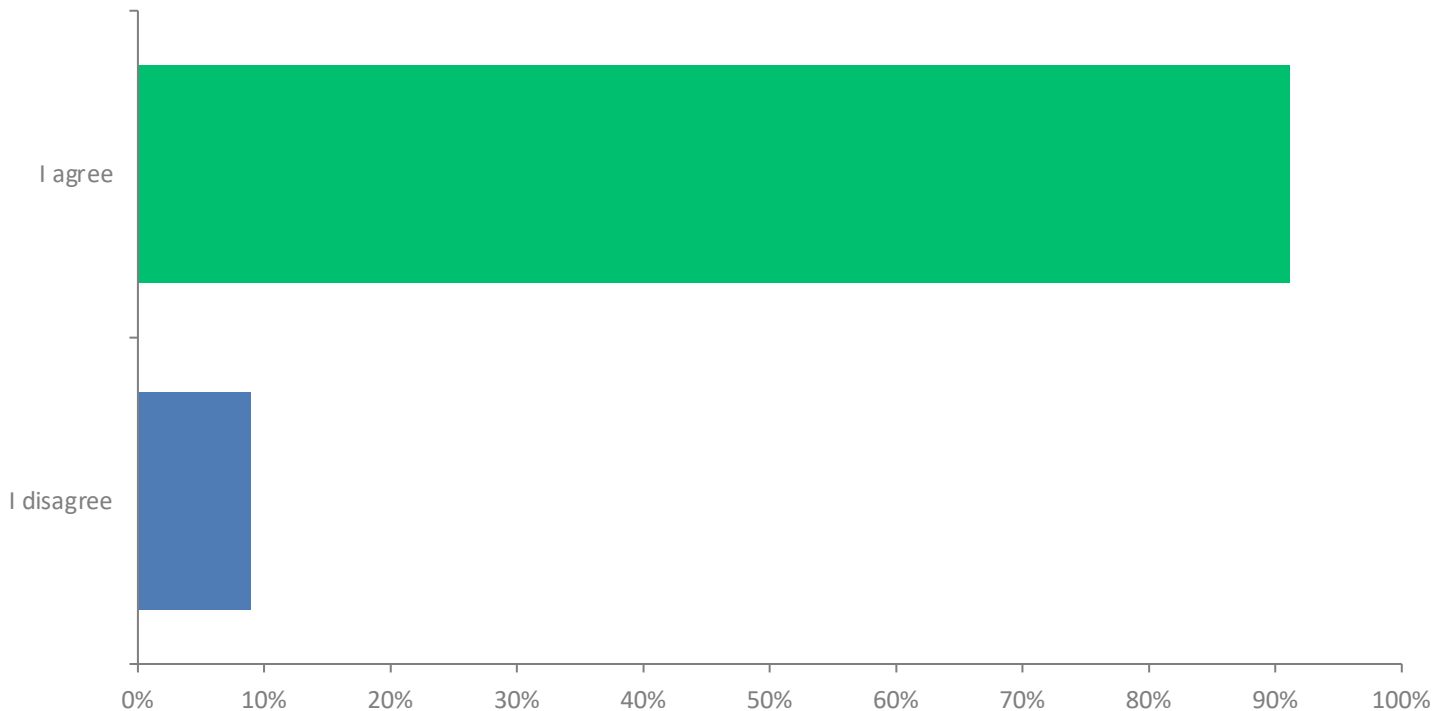

# applies also to ARDS from COVID-19 (moderate level of evidence given indirectness).

Answered: 45 Skipped: 0

| ANSWER CHOICES | RESPONSES |    |
|----------------|-----------|----|
| I agree        | 91.11%    | 41 |
| I disagree     | 8.89%     | 4  |
| TOTAL          |           | 45 |

# make a recommendation for patients with AHRF not due to COVID-19 (no recommendation; no evidence).

Answered: 45 Skipped: 0

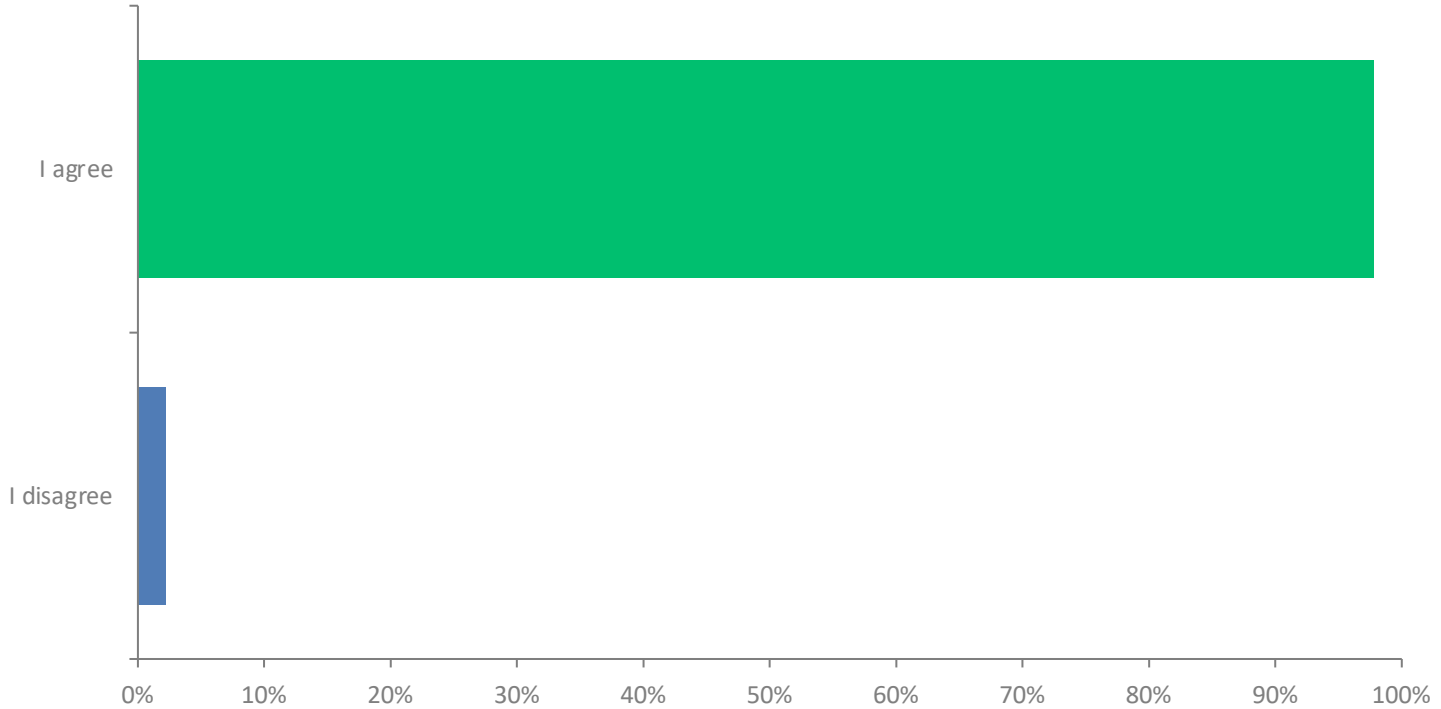

# make a recommendation for patients with AHRF not due to COVID-19 (no recommendation; no evidence).

Answered: 45 Skipped: 0

| ANSWER CHOICES | RESPONSES |    |
|----------------|-----------|----|
| I agree        | 97.78%    | 44 |
| I disagree     | 2.22%     | 1  |
| TOTAL          |           | 45 |

# NMBA to reduce mortality in patients with moderate to severe ARDS due to COVID-19 (no recommendation; no evidence).

Answered: 45 Skipped: 0

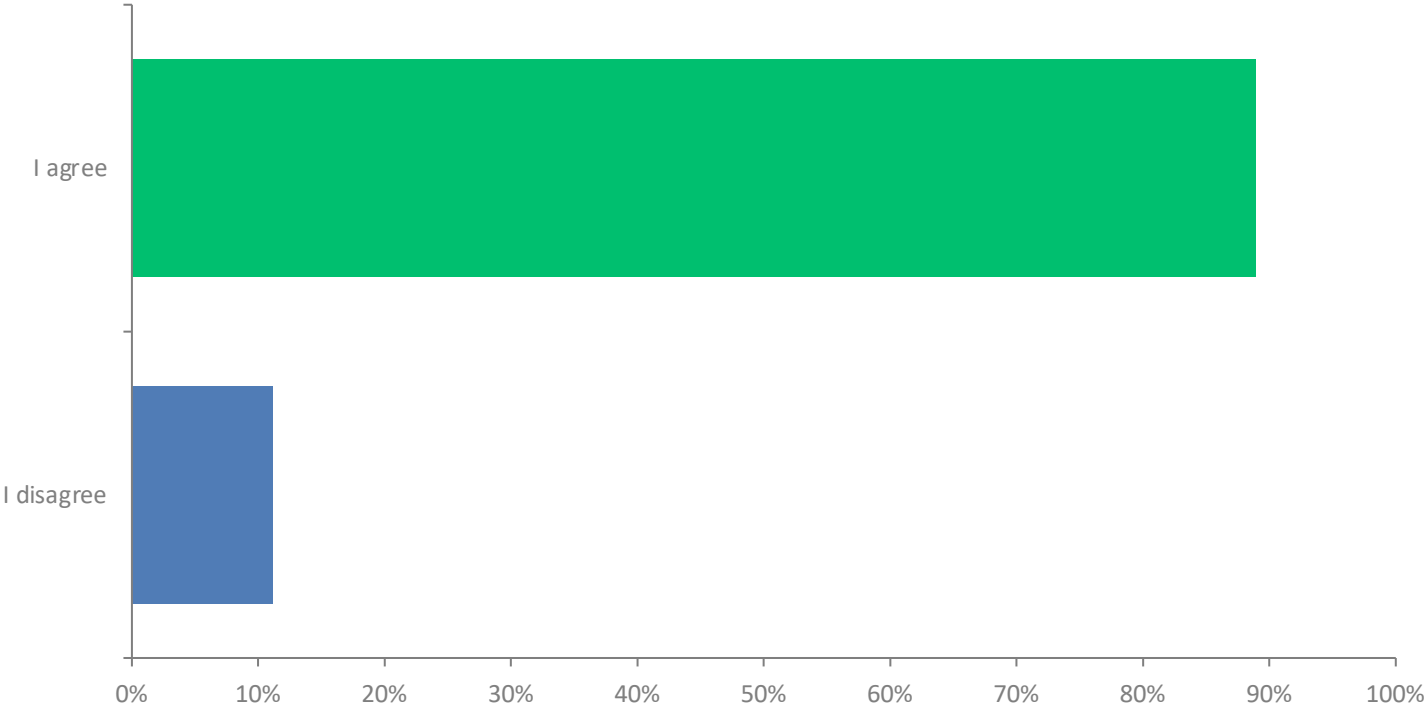

# NMBA to reduce mortality in patients with moderate to severe ARDS due to COVID-19 (no recommendation; no evidence).

Answered: 45 Skipped: 0

| ANSWER CHOICES | RESPONSES |    |
|----------------|-----------|----|
| I agree        | 88.89%    | 40 |
| I disagree     | 11.11%    | 5  |
| TOTAL          |           | 45 |
