# Supplementary material for: ESICM guidelines on acute respiratory distress syndrome: definition, phenotyping and respiratory support strategies
Source: PubMed Central journal article supplement — Intensive Care Med. 2023 Jun 16;49(7):727–59. doi: 10.1007/s00134-023-07050-7 (PMC10354163; doi:10.1007/s00134-023-07050-7), 2023-06-16
Supplement: 134_2023_7050_MOESM3_ESM.pdf [file 134_2023_7050_MOESM3_ESM.pdf]

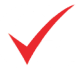

Reporting Items for Practice Guidelines in Healthcare

- [RIGHT Statement](#)
- [Extensions](#)
- [Translations](#)
- [Publications](#)
- [Endorsement](#)
- [Ab](#)

Home / RIGHT Statement / RIGHT Checklist

## RIGHT Checklist

| <b>RIGHT (Reporting Items for practice Guidelines in HealThcare) Checklist</b> |                                                                                                                  |                                                                                                                    |                     |                     |
|--------------------------------------------------------------------------------|------------------------------------------------------------------------------------------------------------------|--------------------------------------------------------------------------------------------------------------------|---------------------|---------------------|
| 22 Sections/topics and 35 Items                                                |                                                                                                                  | Asse<br>sme<br>nt                                                                                                  | P<br>ag<br>e(<br>s) | N<br>ot<br>e(<br>s) |
| Se<br>cti<br>on/<br>top<br>ic                                                  | No./ Item                                                                                                        |                                                                                                                    |                     |                     |
| <b>Basic information</b>                                                       |                                                                                                                  |                                                                                                                    |                     |                     |
| <b>Title/subtitle</b>                                                          |                                                                                                                  |                                                                                                                    |                     |                     |
| 1a                                                                             | Identify the report as a guideline, that is, with “guideline(s)” or “recommendation(s)” in the title.            | <input checked="" type="checkbox"/> Yes<br><input type="checkbox"/> No<br><input type="checkbox"/> Un<br>cle<br>ar |                     |                     |
| 1b                                                                             | Describe the year of publication of the guideline.                                                               | <input checked="" type="checkbox"/> Yes<br><input type="checkbox"/> No<br><input type="checkbox"/> Un<br>cle<br>ar |                     |                     |
| 1c                                                                             | Describe the focus of the guideline, such as screening, diagnosis, treatment, management, prevention, or others. | <input checked="" type="checkbox"/> Yes<br><input type="checkbox"/> No<br><input type="checkbox"/> Un<br>cle<br>ar |                     |                     |
| <b>Executive summary</b>                                                       |                                                                                                                  |                                                                                                                    |                     |                     |
| 2                                                                              | Provide a summary of the recommendations contained in the guideline.                                             | <input checked="" type="checkbox"/> Yes<br><input type="checkbox"/> No                                             |                     |                     |

|                                                        |                                                                                                                                                                                     |                                                                                                            |  |  |
|--------------------------------------------------------|-------------------------------------------------------------------------------------------------------------------------------------------------------------------------------------|------------------------------------------------------------------------------------------------------------|--|--|
|                                                        |                                                                                                                                                                                     | <input type="checkbox"/> Unclear                                                                           |  |  |
| <b>Abbreviations and acronyms</b>                      |                                                                                                                                                                                     |                                                                                                            |  |  |
| 3                                                      | Define new or key terms, and provide a list of abbreviations and acronyms if applicable.                                                                                            | <input checked="" type="checkbox"/> Yes<br><input type="checkbox"/> No<br><input type="checkbox"/> Unclear |  |  |
| <b>Corresponding developer</b>                         |                                                                                                                                                                                     |                                                                                                            |  |  |
| 4                                                      | Identify at least 1 corresponding developer or author who can be contacted about the guideline.                                                                                     | <input checked="" type="checkbox"/> Yes<br><input type="checkbox"/> No<br><input type="checkbox"/> Unclear |  |  |
| <b>Background</b>                                      |                                                                                                                                                                                     |                                                                                                            |  |  |
| <b>Brief description of the health problem(s)</b>      |                                                                                                                                                                                     |                                                                                                            |  |  |
| 5                                                      | Describe the basic epidemiology of the problem, such as the prevalence/incidence, morbidity, mortality, and burden (including financial) resulting from the problem.                | <input checked="" type="checkbox"/> Yes<br><input type="checkbox"/> No<br><input type="checkbox"/> Unclear |  |  |
| <b>Aim(s) of the guideline and specific objectives</b> |                                                                                                                                                                                     |                                                                                                            |  |  |
| 6                                                      | Describe the aim(s) of the guideline and specific objectives, such as improvements in health indicators (e.g., mortality and disease prevalence), quality of life, or cost savings. | <input checked="" type="checkbox"/> Yes<br><input type="checkbox"/> No<br><input type="checkbox"/> Unclear |  |  |
| <b>Target populations</b>                              |                                                                                                                                                                                     |                                                                                                            |  |  |
| 7a                                                     | Describe the primary population(s) that is affected by the recommendation(s) in the guideline.                                                                                      | <input checked="" type="checkbox"/> Yes<br><input type="checkbox"/> No<br><input type="checkbox"/> Unclear |  |  |
| 7b                                                     | Describe any subgroups that are given special consideration in the guideline.                                                                                                       | <input checked="" type="checkbox"/> Yes<br><input type="checkbox"/> No<br><input type="checkbox"/> Unclear |  |  |
| <b>End users and settings</b>                          |                                                                                                                                                                                     |                                                                                                            |  |  |
| 8a                                                     | Describe the intended primary users of the guideline (such as primary care providers, clinical specialists, public health practitioners, program managers, and                      | <input checked="" type="checkbox"/> Yes<br><input type="checkbox"/> No<br><input type="checkbox"/> Unclear |  |  |

|                                                            |                                                                                                                                                                                                                                                                                      |                                                                                                            |  |  |
|------------------------------------------------------------|--------------------------------------------------------------------------------------------------------------------------------------------------------------------------------------------------------------------------------------------------------------------------------------|------------------------------------------------------------------------------------------------------------|--|--|
|                                                            | policymakers) and other potential users of the guideline.                                                                                                                                                                                                                            |                                                                                                            |  |  |
| 8b                                                         | Describe the setting(s) for which the guideline is intended, such as primary care, low- and middle-income countries, or inpatient facilities.                                                                                                                                        | <input checked="" type="checkbox"/> Yes<br><input type="checkbox"/> No<br><input type="checkbox"/> Unclear |  |  |
| <b>Guideline development groups</b>                        |                                                                                                                                                                                                                                                                                      |                                                                                                            |  |  |
| 9a                                                         | Describe how all contributors to the guideline development were selected and their roles and responsibilities (e.g., steering group, guideline panel, external reviewer, systematic review team, and methodologists).                                                                | <input checked="" type="checkbox"/> Yes<br><input type="checkbox"/> No<br><input type="checkbox"/> Unclear |  |  |
| 9b                                                         | List all individuals involved in developing the guideline, including their title, role(s) and institutional affiliation(s).                                                                                                                                                          | <input checked="" type="checkbox"/> Yes<br><input type="checkbox"/> No<br><input type="checkbox"/> Unclear |  |  |
| <b>Evidence</b>                                            |                                                                                                                                                                                                                                                                                      |                                                                                                            |  |  |
| <b>Health care questions</b>                               |                                                                                                                                                                                                                                                                                      |                                                                                                            |  |  |
| 10a                                                        | State the key questions that were the basis for the recommendations in PICO (population, intervention, comparator, and outcome) or other format as appropriate.                                                                                                                      | <input checked="" type="checkbox"/> Yes<br><input type="checkbox"/> No<br><input type="checkbox"/> Unclear |  |  |
| 10b                                                        | Indicate how the outcomes were selected and sorted.                                                                                                                                                                                                                                  | <input checked="" type="checkbox"/> Yes<br><input type="checkbox"/> No<br><input type="checkbox"/> Unclear |  |  |
| <b>Systematic reviews</b>                                  |                                                                                                                                                                                                                                                                                      |                                                                                                            |  |  |
| 11a                                                        | Indicate whether the guideline is based on new systematic reviews done specifically for this guideline or whether existing systematic reviews were used.                                                                                                                             | <input checked="" type="checkbox"/> Yes<br><input type="checkbox"/> No<br><input type="checkbox"/> Unclear |  |  |
| 11b                                                        | If the guideline developers used existing systematic reviews, reference these and describe how those reviews were identified and assessed (provide the search strategies and the selection criteria, and describe how the risk of bias was evaluated) and whether they were updated. | <input checked="" type="checkbox"/> Yes<br><input type="checkbox"/> No<br><input type="checkbox"/> Unclear |  |  |
| <b>Assessment of the certainty of the body of evidence</b> |                                                                                                                                                                                                                                                                                      |                                                                                                            |  |  |

|                                                  |                                                                                                                                                                                                                                                                                                            |                                                                                                            |  |  |
|--------------------------------------------------|------------------------------------------------------------------------------------------------------------------------------------------------------------------------------------------------------------------------------------------------------------------------------------------------------------|------------------------------------------------------------------------------------------------------------|--|--|
| 12                                               | Describe the approach used to assess the certainty of the body of evidence.                                                                                                                                                                                                                                | <input checked="" type="checkbox"/> Yes<br><input type="checkbox"/> No<br><input type="checkbox"/> Unclear |  |  |
| <b>Recommendations</b>                           |                                                                                                                                                                                                                                                                                                            |                                                                                                            |  |  |
| <b>Recommendations</b>                           |                                                                                                                                                                                                                                                                                                            |                                                                                                            |  |  |
| 13a                                              | Provide clear, precise, and actionable recommendations.                                                                                                                                                                                                                                                    | <input checked="" type="checkbox"/> Yes<br><input type="checkbox"/> No<br><input type="checkbox"/> Unclear |  |  |
| 13b                                              | Present separate recommendations for important subgroups if the evidence suggests that there are important differences in factors influencing recommendations, particularly the balance of benefits and harms across subgroups.                                                                            | <input checked="" type="checkbox"/> Yes<br><input type="checkbox"/> No<br><input type="checkbox"/> Unclear |  |  |
| 13c                                              | Indicate the strength of recommendations and the certainty of the supporting evidence.                                                                                                                                                                                                                     | <input checked="" type="checkbox"/> Yes<br><input type="checkbox"/> No<br><input type="checkbox"/> Unclear |  |  |
| <b>Rationale/explanation for recommendations</b> |                                                                                                                                                                                                                                                                                                            |                                                                                                            |  |  |
| 14a                                              | Describe whether values and preferences of the target population(s) were considered in the formulation of each recommendation. If yes, describe the approaches and methods used to elicit or identify these values and preferences. If values and preferences were not considered, provide an explanation. | <input checked="" type="checkbox"/> Yes<br><input type="checkbox"/> No<br><input type="checkbox"/> Unclear |  |  |
| 14b                                              | Describe whether cost and resource implications were considered in the formulation of recommendations. If yes, describe the specific approaches and methods used (such as cost-effectiveness analysis) and summarize the results. If resource issues were not considered, provide an explanation.          | <input checked="" type="checkbox"/> Yes<br><input type="checkbox"/> No<br><input type="checkbox"/> Unclear |  |  |
| 14c                                              | Describe other factors taken into consideration when formulating the recommendations, such as equity, feasibility and acceptability.                                                                                                                                                                       | <input checked="" type="checkbox"/> Yes<br><input type="checkbox"/> No<br><input type="checkbox"/> Unclear |  |  |
| <b>Evidence to decision processes</b>            |                                                                                                                                                                                                                                                                                                            |                                                                                                            |  |  |
| 15                                               | Describe the processes and approaches used by the guideline development group to make decisions, particularly the formulation of recommendations (such                                                                                                                                                     | <input checked="" type="checkbox"/> Yes<br><input type="checkbox"/> No                                     |  |  |

|                                                         |                                                                                                                                                     |                                                                                                            |  |  |
|---------------------------------------------------------|-----------------------------------------------------------------------------------------------------------------------------------------------------|------------------------------------------------------------------------------------------------------------|--|--|
|                                                         | as how consensus was defined and achieved and whether voting was used).                                                                             | <input type="checkbox"/> Unclear                                                                           |  |  |
| <b>Review and quality assurance</b>                     |                                                                                                                                                     |                                                                                                            |  |  |
| <b>External review</b>                                  |                                                                                                                                                     |                                                                                                            |  |  |
| 16                                                      | Indicate whether the draft guideline underwent independent review and, if so, how this was executed and the comments considered and addressed.      | <input type="checkbox"/> Yes<br><input checked="" type="checkbox"/> No<br><input type="checkbox"/> Unclear |  |  |
| <b>Quality assurance</b>                                |                                                                                                                                                     |                                                                                                            |  |  |
| 17                                                      | Indicate whether the guideline was subjected to a quality assurance process. If yes, describe the process.                                          | <input checked="" type="checkbox"/> Yes<br><input type="checkbox"/> No<br><input type="checkbox"/> Unclear |  |  |
| <b>Funding, declaration and management of interests</b> |                                                                                                                                                     |                                                                                                            |  |  |
| <b>Funding source(s) and role(s) of the funder</b>      |                                                                                                                                                     |                                                                                                            |  |  |
| 18a                                                     | Describe the specific sources of funding for all stages of guideline development.                                                                   | <input checked="" type="checkbox"/> Yes<br><input type="checkbox"/> No<br><input type="checkbox"/> Unclear |  |  |
| 18b                                                     | Describe the role of funder(s) in the different stages of guideline development and in the dissemination and implementation of the recommendations. | <input type="checkbox"/> Yes<br><input checked="" type="checkbox"/> No<br><input type="checkbox"/> Unclear |  |  |
| <b>Declaration and management of interest</b>           |                                                                                                                                                     |                                                                                                            |  |  |
| 19a                                                     | Describe what types of conflicts (financial and nonfinancial) were relevant to guideline development.                                               | <input checked="" type="checkbox"/> Yes<br><input type="checkbox"/> No<br><input type="checkbox"/> Unclear |  |  |
| 19b                                                     | Describe how conflicts of interest were evaluated and managed and how users of the guideline can access the declarations.                           | <input checked="" type="checkbox"/> Yes<br><input type="checkbox"/> No<br><input type="checkbox"/> Unclear |  |  |
| <b>Other information</b>                                |                                                                                                                                                     |                                                                                                            |  |  |
| <b>Access</b>                                           |                                                                                                                                                     |                                                                                                            |  |  |
| 20                                                      | Describe where the guideline, its appendices, and other related documents can be accessed.                                                          | <input checked="" type="checkbox"/> Yes<br><input type="checkbox"/> No                                     |  |  |

|                                                                                                                                                                                                                                                                                                                                                                                               |                                                                                                                                                                                                                                                                            |                                                                                                            |  |  |
|-----------------------------------------------------------------------------------------------------------------------------------------------------------------------------------------------------------------------------------------------------------------------------------------------------------------------------------------------------------------------------------------------|----------------------------------------------------------------------------------------------------------------------------------------------------------------------------------------------------------------------------------------------------------------------------|------------------------------------------------------------------------------------------------------------|--|--|
|                                                                                                                                                                                                                                                                                                                                                                                               |                                                                                                                                                                                                                                                                            | <input type="checkbox"/> Unclear                                                                           |  |  |
| <b>Suggestions for further research</b>                                                                                                                                                                                                                                                                                                                                                       |                                                                                                                                                                                                                                                                            |                                                                                                            |  |  |
| 21                                                                                                                                                                                                                                                                                                                                                                                            | Describe the gaps in the evidence and/or provide suggestions for future research.                                                                                                                                                                                          | <input checked="" type="checkbox"/> Yes<br><input type="checkbox"/> No<br><input type="checkbox"/> Unclear |  |  |
| <b>Limitations of the guideline</b>                                                                                                                                                                                                                                                                                                                                                           |                                                                                                                                                                                                                                                                            |                                                                                                            |  |  |
| 22                                                                                                                                                                                                                                                                                                                                                                                            | Describe any limitations in the guideline development process (such as the development groups were not multidisciplinary or patients' values and preferences were not sought), and indicate how these limitations might have affected the validity of the recommendations. | <input checked="" type="checkbox"/> Yes<br><input type="checkbox"/> No<br><input type="checkbox"/> Unclear |  |  |
| <p><b>Reference:</b><br/>Chen Y, Yang K, Marušić A, et al. A Reporting Tool for Practice Guidelines in Health Care: The RIGHT Statement[J]. Annals of Internal Medicine, 2017, 166(2):128-132. <a href="https://doi.org/10.7326/M16-1565">https://doi.org/10.7326/M16-1565</a><br/><b>Official Website:</b> <a href="http://www.right-statement.org/">http://www.right-statement.org/</a></p> |                                                                                                                                                                                                                                                                            |                                                                                                            |  |  |

Our sponsors, supporters and partners

IO Collaborating Centre for  
Guideline Implementation and  
Knowledge Translation

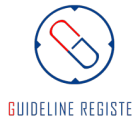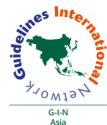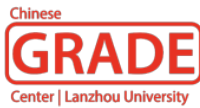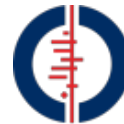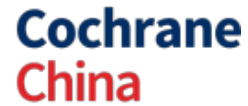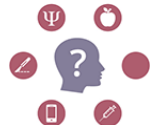

Copyright 2015 - 2023 RIGHT Statement. All rights reserved.
